# Supplementary material for: SMILE Downregulation during Melanogenesis Induces MITF Transcription in B16F10 Cells
Source: MDPI journal article supplement (doi:10.3390/ijms232315094), 2022-12-01
Supplement: s1 [file s1]

**Table S1.** Primer sequences used for RT-qPCR

| Genes           | RT-qPCR Primers          |                           |
|-----------------|--------------------------|---------------------------|
|                 | Forward                  | Reverse                   |
| Mitf-M          | GCCTGAAACCTTGCTATGCTGGAA | AAGGTACTGCTTTACCTGGTGCCT  |
| Tyr             | CTCTGGGCTTAGCAGTAGGC     | GCAAGCTGTGGTAGTCGTCT      |
| Trp1            | TGGGGATGTGGATTTCTCTC     | AGGGAGAAAGAAGGCTCCTG      |
| Trp2            | AGGTACCATCTGTTGTGGCTGGAA | AGTTCCGACTAATCAGCGTTGGGT  |
| Smile           | GGGAGAAGAGGCGGAGAAAG     | AGGTAGCGACTCTCCTCCTG      |
| RPLP0           | GTGCTGATGGGCAAGAAC       | AGGTCCTCCTTGGTGAAC        |
| ChIP primer CRE | CAGTGAGCTTGACTTTGATAGC   | AATATTGATATCAGTTTCCCTGCTG |
